# Supplementary material
Source: PubMed Central journal article supplement (PMC6435279)
Supplement: NIHMS1521898-supplement-SUPPLEMENTAL_MATERIAL.pdf [file NIHMS1521898-supplement-SUPPLEMENTAL_MATERIAL.pdf]

## SUPPLEMENTAL MATERIAL

### A Decision Analysis Model for Pre-hospital Triage of Patients with Acute Stroke

Yaqian Xu, MD; Neal S. Parikh, MD; Boshen Jiao, MPH; Joshua Z. Willey, MD, MS; Amelia K. Boehme, PhD; Mitchell S. V. Elkind, MD, MS

#### Table of Contents

##### Supplemental Tables:

Table I. Assumptions for time-independent probabilities and time-dependent probabilities and formulae Page 2

Table II. Full-range of positive predictive values and false negative rates used in sensitivity analysis for probability of large vessel occlusion Page 4

Table III. Time variable inputs Page 5

Table IV. Selected time thresholds for mothership to be the preferred strategy in an analysis with onset to EMS arrival time of 60 minutes, under real-world time metrics Page 7

##### Supplemental Figures:

Figure I. One-way sensitivity analyses Page 8

Figure II. Two-way sensitivity analyses Page 9

**Supplemental Video Legend** Page 10

**References** Page 11

**Table I. Assumptions for time-independent probabilities and time-dependent probabilities and formulae**

| Variable name                                                                       | Description                                                                  | Probability/ Formula             | Notes                                                                                                                                                                                    |
|-------------------------------------------------------------------------------------|------------------------------------------------------------------------------|----------------------------------|------------------------------------------------------------------------------------------------------------------------------------------------------------------------------------------|
| <b>Key time-independent probabilities</b>                                           |                                                                              |                                  |                                                                                                                                                                                          |
| <b>Pel</b>                                                                          | P of not having IV-tPA contraindication within the 4.5 hour window           | 0.35                             | This probability accounts for contraindications and real-world reasons for IV-tPA withholding in the 3 hour window, including ICH/SAH and rapidly improving or mild stroke. <sup>1</sup> |
| <b>Ptpa1</b>                                                                        | P of receiving IV-tPA treatment among those without contraindication         | 0.82                             | As seen in 2010-2011 in Get With The Guidelines-Stroke analysis. <sup>1</sup>                                                                                                            |
| <b>Ptpa</b>                                                                         | P of receiving IV-tPA (=Pel*Ptpa1)                                           | 0.287                            |                                                                                                                                                                                          |
| <b>Plvo</b>                                                                         | P of LVO in absence of screening; prevalence estimate no. 1                  | 0.0487                           | Percentage of LVO among all suspected stroke patients from a real-world EMS study in North Carolina. <sup>2</sup>                                                                        |
|                                                                                     | P of LVO in absence of screening; prevalence estimate no. 2                  | 0.118                            | Percentage of LVO among all AIS codes (including transient ischemic stroke) in West Virginia. <sup>3</sup>                                                                               |
|                                                                                     | Screened negative                                                            | Negative omission rate ranges    | Derived from combinations of LVO prevalence and sensitivity/specificity of LVO scales using Bayes theorem                                                                                |
|                                                                                     | Screened positive                                                            | Positive predictive value ranges | Derived from combinations of LVO prevalence and sensitivity/specificity of LVO scales using Bayes theorem                                                                                |
| <b>Pendo</b>                                                                        | P of endovascular therapy eligibility among LVO patients                     | 0.865                            | Derived from data reported in a population-based estimate. <sup>3</sup>                                                                                                                  |
| <b>Pearly</b>                                                                       | P of early reperfusion from IV-tPA among LVO patients                        | 0.054                            | Based on percent without target occlusion at time of catheterization angiography in the HERMES collaboration study. <sup>4</sup>                                                         |
| <b>Pre</b>                                                                          | P of substantial reperfusion in endovascular therapy                         | 0.71                             | This rate of substantial reperfusion was reported in the HERMES collaboration study. <sup>4</sup>                                                                                        |
| <b>Pgnp1</b>                                                                        | P of mRS0-1 in no LVO patients who did not receive tPA                       | 0.4                              | Derived from percentage of mRS 0-1 in the placebo group with small-vessel occlusive stroke subtype in the NINDS trial. <sup>5</sup>                                                      |
| <b>Pgnp2</b>                                                                        | P of mRS0-1 in LVO patients who did not receive tPA or endovascular therapy  | 0.25                             | Derived from weighted average of percentage of mRS 0-1 reported in the placebo group with large-vessel occlusive and cardioembolic stroke subtype in the NINDS trial. <sup>5</sup>       |
| <b>Time-dependent probabilities after IV-tPA, for patients without and with LVO</b> |                                                                              |                                  |                                                                                                                                                                                          |
| <b>No LVO, IV-tPA only</b>                                                          |                                                                              |                                  |                                                                                                                                                                                          |
|                                                                                     | P of mRS 0-1 at onset-to-needle time of 15 min                               | 0.63                             | Derived from reported percentage of mRS 0-1 in the IV-tPA group with small-vessel occlusive stroke subtype in the NINDS trial. <sup>5</sup>                                              |
|                                                                                     | P of mRS 0-1 decline by 1 min delay in onset-to-needle time, 15-150 minutes  | 0.000731                         | Derived from the GWTG reported time-benefit curve decay variable for IV-tPA. <sup>6</sup>                                                                                                |
|                                                                                     | P of mRS 0-1 decline by 1 min delay in onset-to-needle time, 150-270 minutes | 0.0003                           | Derived from the GWTG reported time-benefit curve decay variable for IV-tPA. <sup>6</sup>                                                                                                |
| <b>Outcome</b>                                                                      | 0-150 minute window                                                          | 0.63- 0.00073*(to_n -15)         | Derived from the GWTG reported time-benefit curve decay variable for IV-tPA. <sup>6</sup>                                                                                                |
|                                                                                     | 150-270 minute window                                                        | 0.53- 0.0003*(to_n -150)         |                                                                                                                                                                                          |

| <b>LVO, IV-tPA only</b>                                                            |                                                                              |                               |                                                                                                                                                                                                                   |
|------------------------------------------------------------------------------------|------------------------------------------------------------------------------|-------------------------------|-------------------------------------------------------------------------------------------------------------------------------------------------------------------------------------------------------------------|
|                                                                                    | P of mRS 0-1 at onset-to-needle time of 15 min                               | 0.389                         | Weighted average of percentage of mRS 0-1 in the IV-tPA group with large-vessel occlusive and cardioembolic stroke subtype in NINDS trial. <sup>5</sup>                                                           |
|                                                                                    | P of mRS 0-1 decline by 1 min delay in onset-to-needle time, 15-150 minutes  | 0.000731                      | Derived from the GWTG reported time-benefit curve decay variable for IV-tP. <sup>6</sup>                                                                                                                          |
|                                                                                    | P of mRS 0-1 decline by 1 min delay in onset-to-needle time, 150-270 minutes | 0.0003                        | Derived from the GWTG reported time-benefit curve decay variable for IV-tPA. <sup>6</sup>                                                                                                                         |
| <b>Outcome</b>                                                                     | 0-150 minute window                                                          | 0.63- 0.00073*(to_n -15)      | Derived from the GWTG reported time-benefit curve decay variable for IV-tPA. <sup>6</sup>                                                                                                                         |
|                                                                                    | 150-270 minute window                                                        | 0.53- 0.0003*(to_n -150)      |                                                                                                                                                                                                                   |
| <b>Endovascular therapy, with early reperfusion from IV-tPA</b>                    |                                                                              |                               |                                                                                                                                                                                                                   |
|                                                                                    | P of mRS 0-1 at onset-to-puncture time of 180 min                            | 0.394                         | Derived from results reported in the HERMES collaboration study. <sup>4</sup> Early reperfusion would be known at time of groin puncture, so the time of early reperfusion was set at the time of groin puncture. |
| <b>Outcome</b>                                                                     | Time dependent probability of an excellent outcome                           | 0.394- 0.00052*(to_evt -180)  | Derived from results reported in the HERMES collaboration study. <sup>4</sup>                                                                                                                                     |
| <b>Endovascular therapy with substantial reperfusion from successful procedure</b> |                                                                              |                               |                                                                                                                                                                                                                   |
|                                                                                    | P of mRS 0-1 at onset-to-reperfusion time of 180 min                         | 0.394                         | Derived from results reported in the HERMES collaboration study. <sup>4</sup>                                                                                                                                     |
| <b>Outcome</b>                                                                     | Time dependent probability of an excellent outcome                           | 0.394- 0.00052*(to_evtr -180) | Derived from results reported in the HERMES collaboration study. <sup>4</sup>                                                                                                                                     |
| <b>Endovascular therapy without substantial reperfusion</b>                        |                                                                              |                               |                                                                                                                                                                                                                   |
|                                                                                    | P of mRS 0-1 at onset-to-puncture time of 120 min                            | 0.222                         | Derived from results reported in the HERMES collaboration study. <sup>4</sup>                                                                                                                                     |
| <b>Outcome</b>                                                                     | Time dependent probability of an excellent outcome                           | 0.222- 0.00052*(to_n -120)    | Derived from results reported in the HERMES collaboration study. <sup>4</sup>                                                                                                                                     |

mRS, modified Rankin Scale; P, probability; LVO, large vessel occlusion.

**Table II. Full-range of positive predictive values and false negative rates used in sensitivity analysis for probability of large vessel occlusion**

| LVO screening scales <sup>7-10</sup><br>* | Cutoff | Sensitivity | Specificity | Positive Likelihood Ratio (LR+) <sup>‡</sup> | Range <sup>†</sup>              |                             |                                 |                             |
|-------------------------------------------|--------|-------------|-------------|----------------------------------------------|---------------------------------|-----------------------------|---------------------------------|-----------------------------|
|                                           |        |             |             |                                              | LVO prevalence = 0.118          |                             | LVO prevalence = 0.0487         |                             |
|                                           |        |             |             |                                              | Positive Predictive Value (PPV) | False Negative Rate (FNR) § | Positive Predictive Value (PPV) | False Negative Rate (FNR) § |
| <b>3I-SS</b>                              | ≥4     | 0.30-0.67   | 0.92-0.95   | 6.0-8.4                                      | 0.45-0.53                       | 0.05-0.09                   | 0.24-0.30                       | 0.02-0.04                   |
| <b>C-STAT</b>                             | ≥2     | 0.47-0.89   | 0.40-0.90   | 1.4-5.4                                      | 0.16-0.42                       | 0.02-0.07                   | 0.07-0.22                       | 0.01-0.03                   |
| <b>FAST-ED</b>                            | ≥4     | 0.61-0.70   | 0.88-0.89   | 5.5-5.8                                      | 0.43-0.44                       | 0.04-0.06                   | 0.22-0.23                       | 0.01-0.02                   |
| <b>LAMS</b>                               | ≥4     | 0.47-0.81   | 0.58-0.90   | 1.8-7.3                                      | 0.19-0.50                       | 0.03-0.07                   | 0.08-0.27                       | 0.01-0.03                   |
| <b>PASS</b>                               | ≥2     | 0.64-0.79   | 0.59-0.84   | 1.9-4.4                                      | 0.20-0.37                       | 0.04-0.06                   | 0.09-0.19                       | 0.01-0.02                   |
| <b>RACE</b>                               | ≥5     | 0.55-0.85   | 0.68-0.90   | 2.2-6.6                                      | 0.23-0.47                       | 0.03-0.07                   | 0.10-0.25                       | 0.01-0.03                   |
| <b>G-FAST</b>                             | ≥3     | 0.89        | 0.39        | 1.5                                          | 0.16                            | 0.04                        | 0.07                            | 0.01                        |
| <b>Overall</b>                            |        | 0.30-0.89   | 0.39-0.95   | 1.4-8.4                                      | 0.16-0.53                       | 0.02-0.09                   | 0.07-0.30                       | 0.01-0.04                   |

\* 3I-SS, 3-item Stroke Scale; RACE, Rapid Arterial Occlusion Evaluation; LAMS, Los Angeles Motor Scale; FAST-ED, Field Assessment Stroke Triage for Emergency Destination; G-FAST, gaze-face-arm-speech-time score; PASS, Prehospital Acute Stroke Severity scale; C-STAT, Cincinnati Stroke Triage Assessment Tool; LVO, large vessel occlusion.

† Ranges for sensitivity and specificity were extracted from the AHA/ASA systematic review, and three other LVO screening scale validation studies published in 2017; positive predictive values and false negative rates were calculated using Bayes' theorem.

‡ Positive Likelihood Ratio (LR+) = Sensitivity/ (1- Specificity), represents how much the odds of the disease increase when a test is positive.

§ False Negative Rate (FNR) = 1- Negative Predictive Value, represents the probability of having false negatives.

**Table III. Time variable inputs for base case**

| Variable name                         | Description                                                                                                   | Ideal* | Data source                                                                                                                                                                                                                                            | Real-world <sup>11†</sup> |
|---------------------------------------|---------------------------------------------------------------------------------------------------------------|--------|--------------------------------------------------------------------------------------------------------------------------------------------------------------------------------------------------------------------------------------------------------|---------------------------|
| <b>Time spent outside of hospital</b> |                                                                                                               |        |                                                                                                                                                                                                                                                        |                           |
| temt                                  | Onset to EMS arrival                                                                                          | 10     | Ten minutes was chosen simulate the most optimistic scenario of immediate alarm and response, given that the real-world time was reported as only 19 minutes.                                                                                          | 19                        |
| tos                                   | EMS time spent on scene                                                                                       | 15     | In the AHA/ASA 2018 stroke guideline, the median EMS time spent on scene was recommended to be within 15 minutes. <sup>12</sup>                                                                                                                        | 15                        |
| ttrans                                | Scene to the closest PSC                                                                                      | 20     | We assumed that in the base case, the transport time from scene to the closest PSC is 20 minutes.                                                                                                                                                      | 23                        |
| t1                                    | temt+tos+ttrans                                                                                               | 45     |                                                                                                                                                                                                                                                        | 57                        |
| t2                                    | t3+tex                                                                                                        | 20     | A plausible target, as reported by Felix et al using real-world EMS data. <sup>13</sup>                                                                                                                                                                | 35                        |
| t3                                    | t4-t1                                                                                                         | 20     | Additional time if transported directly to CSC comparing with directly to PSC                                                                                                                                                                          | 6                         |
| tex                                   | Detour time (difference in transport time between scene-PSC-CSC in drip-and ship and scene-CSC in mothership) | 0      | In the ideal scenario, we assumed that the PSC is located directly on the route to the CSC.                                                                                                                                                            | 29                        |
| t4                                    | Onset to CSC arrival in mothership                                                                            | 65     |                                                                                                                                                                                                                                                        | 63                        |
| <b>Time spent in hospital</b>         |                                                                                                               |        |                                                                                                                                                                                                                                                        |                           |
| tp1                                   | Door-to-needle time                                                                                           | 35     | Thirty-five minutes was chosen based on data reported from high-performing centers participating in randomized controlled trials, <sup>4</sup> which is shorter than the AHA/ASA target door-to-needle time of 60 minutes. <sup>12</sup>               | 36                        |
| tp2                                   | Additional Door-to-needle time at PSC compared with CSC                                                       | 0      | In the ideal scenario, we assumed the same efficiency for PSCs and CSCs.                                                                                                                                                                               | 20                        |
| to                                    | IV-tPA to PSC departure                                                                                       | 10     |                                                                                                                                                                                                                                                        | 47                        |
| tp <sub>r</sub>                       | tp1+tp2+to                                                                                                    | 45     | We assumed the door-in-door-out time spent in the PSC was 45 minutes. This was derived from the target door-in-door-out time of 30 minutes in STEMI guidelines <sup>14</sup> , modified to account for complexity of stroke evaluation and management. | 103                       |
| to <sub>n1</sub>                      | t1+tp1                                                                                                        | 80     |                                                                                                                                                                                                                                                        | 113                       |
| to <sub>n2</sub>                      | t4+tp1                                                                                                        | 100    |                                                                                                                                                                                                                                                        | 99                        |

|                      |                    |                                                       |     |                                                                                                                                                                                                  |     |
|----------------------|--------------------|-------------------------------------------------------|-----|--------------------------------------------------------------------------------------------------------------------------------------------------------------------------------------------------|-----|
| te1                  |                    | Door-to-puncture time in CSC in drip-and-ship         | 50  | Derived from the median door-to-puncture time reported in the HERMES collaboration representing workflow time in high-performing stroke centers participating in clinical trials. <sup>4</sup>   | 57  |
| tnp                  |                    | Needle-to-puncture time in CSC in mothership          | 30  | Derived from the median needle-to-puncture time reported in the HERMES collaboration representing workflow time in high-performing stroke centers participating in clinical trials. <sup>4</sup> | 48  |
| te2                  | tp1+tnp            | Door-to-puncture time in CSC in mothership            | 65  |                                                                                                                                                                                                  | 84  |
| tre2                 |                    | Puncture-to-reperfusion time for endovascular therapy | 30  | Derived from the Recommendations from the Endovascular Stroke Standards Committee of the Society of Vascular and Interventional Neurology (SVIN). <sup>15</sup>                                  | 37  |
| <b>Drip-and-ship</b> |                    |                                                       |     |                                                                                                                                                                                                  |     |
|                      | t1+tp1+t2          | Onset to CSC arrival in drip-and-ship                 | 110 |                                                                                                                                                                                                  | 195 |
| to_evt1              | t1+tp1+t2+te1      | Onset-to-puncture time for endovascular therapy       | 160 |                                                                                                                                                                                                  | 252 |
| to_evtr1             | t1+tp1+t2+te1+tre2 | Onset-to-reperfusion time for endovascular therapy    | 190 |                                                                                                                                                                                                  | 289 |
| <b>Mothership</b>    |                    |                                                       |     |                                                                                                                                                                                                  |     |
| to_evt2              | t4+tp1+tnp         | Onset-to-puncture time for endovascular therapy       | 130 |                                                                                                                                                                                                  | 147 |
| to_evtr2             | t4+tp1+tnp+tre2    | Onset-to-reperfusion time for endovascular therapy    | 160 |                                                                                                                                                                                                  | 184 |

EMS, emergency medical services; LVO, large vessel occlusion; PSC, primary stroke center; CSC, comprehensive stroke center; STEMI, ST-Elevation Myocardial Infarction.

\*All ideal time metrics were derived from guidelines or data reported from high-performing stroke centers that participated in clinical trials.

†All real-world time metrics were derived from the STRATIS registry, except for the EMS time spent on scene for which the AHA/ASA target time spent on-scene was assumed.

**Table IV. Selected time thresholds for mothership to be the preferred strategy in an analysis with onset to EMS arrival time of 60 minutes, under real-world time metrics\***

| LVO screening methods                                       | LVO Prevalence = 0.0487 |                                        | LVO Prevalence = 0.118 |                                        |
|-------------------------------------------------------------|-------------------------|----------------------------------------|------------------------|----------------------------------------|
|                                                             | Probability of LVO      | Additional transport time to CSC (min) | Probability of LVO     | Additional transport time to CSC (min) |
| Screened "-" <sup>16</sup> †                                | 0.02                    | <28                                    | 0.06                   | <43                                    |
| No Screening <sup>2</sup>                                   | 0.0487                  | <39                                    | 0.118                  | <63                                    |
| Screened "+" ‡                                              |                         |                                        |                        |                                        |
| High sensitivity/<br>Low specificity <sup>17</sup>          | 0.07                    | <46                                    | 0.16                   | <77                                    |
| Moderate sensitivity/<br>Moderate specificity <sup>16</sup> | 0.18                    | <83                                    | 0.36                   | <135                                   |
| Low sensitivity/<br>High specificity <sup>18</sup>          | 0.23                    | <99                                    | 0.45                   | <158                                   |

LVO, Large vessel occlusion; PSC, primary stroke center; CSC, comprehensive stroke center; EMS, emergency medical services.

\* Onset to EMS arrival time was set at 60 minutes to account for longer onset to alarm time and longer EMS respond time.

† Probability of LVO calculated from using a single scale with moderate sensitivity (0.63), moderate specificity (0.85).

‡ We calculated positive predictive values across the full range of reported sensitivity/specificity, and chose to present 3 representative combinations: 1. high sensitivity (0.83), low specificity (0.40), and positive likelihood ratio (1.8); 2. moderate sensitivity (0.63), moderate specificity (0.85), and positive likelihood ratio (4.3); and 3. low sensitivity (0.30), high specificity (0.95), and positive likelihood ratio (6.0).

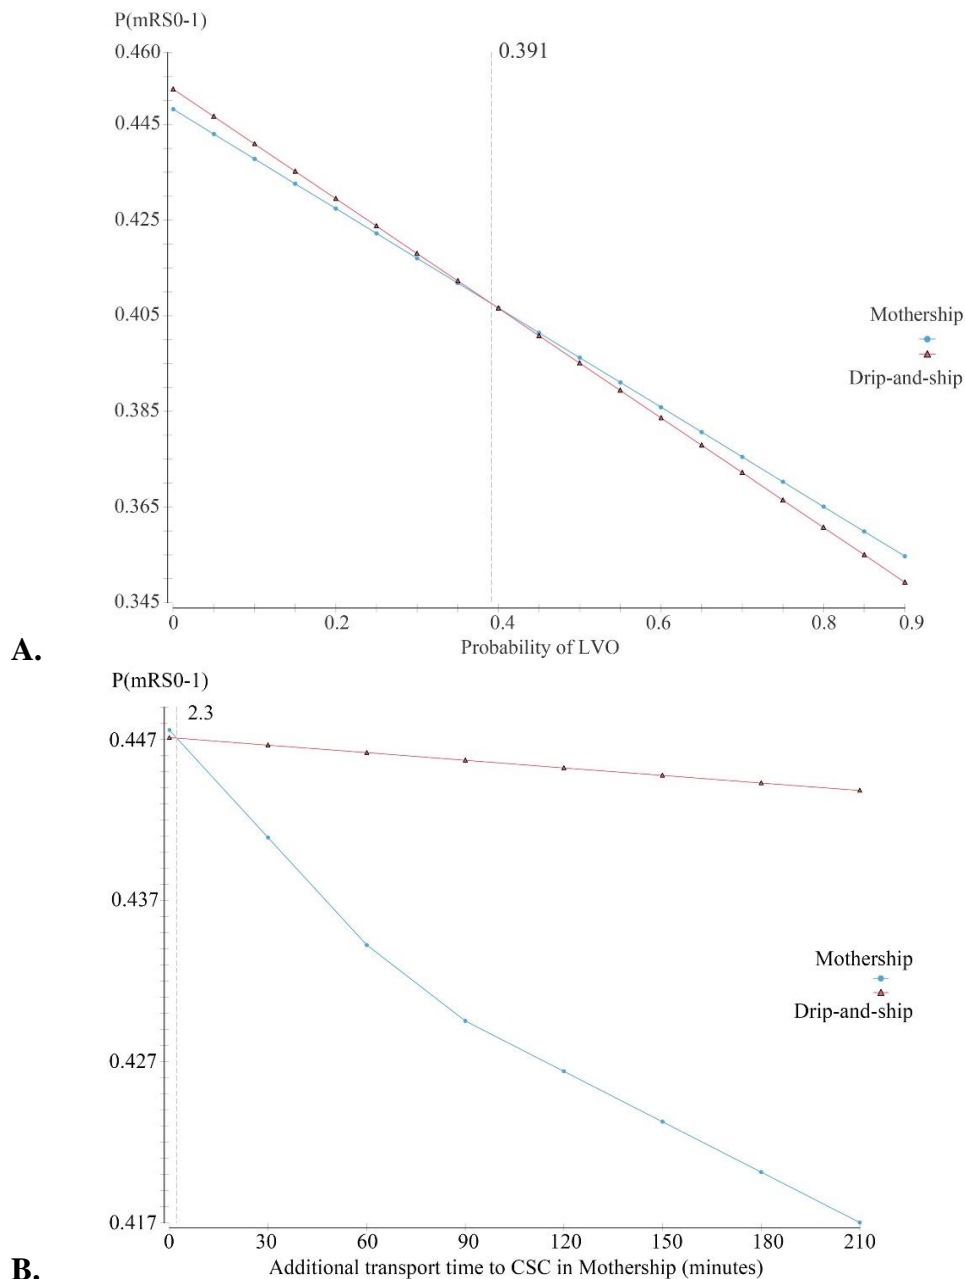

**Figure I. Selected one-way sensitivity analyses.**

One-way sensitivity analyses were conducted by changing one variable at a time while holding all other variables constant using base case values. **(A)** one-way sensitivity analysis of probability of LVO (x-axis) and **(B)** one-way sensitivity analysis of additional travel time to CSC (x-axis). Y-axis: probability of a good outcome (mRS 0-1). Blue line indicates outcome from “Mothership”; Red line indicates outcome from “drip-and-ship”. The higher line was chosen as the preferred triage strategy; the vertical line showed the threshold when the preferred strategy changed. LVO, large vessel occlusion; CSC, comprehensive stroke center; mRS, modified Rankin Scale.



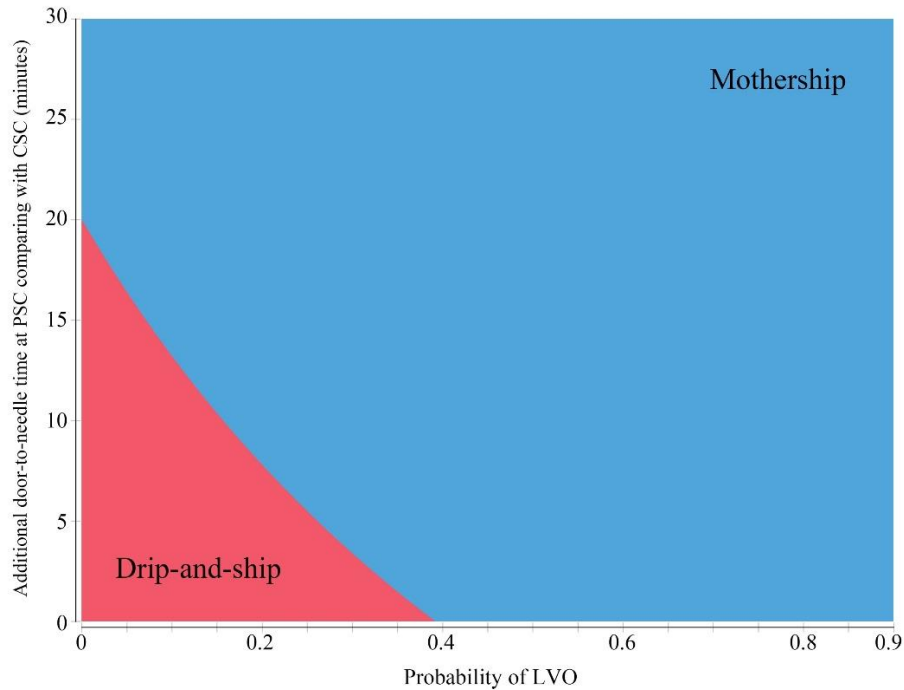

A.

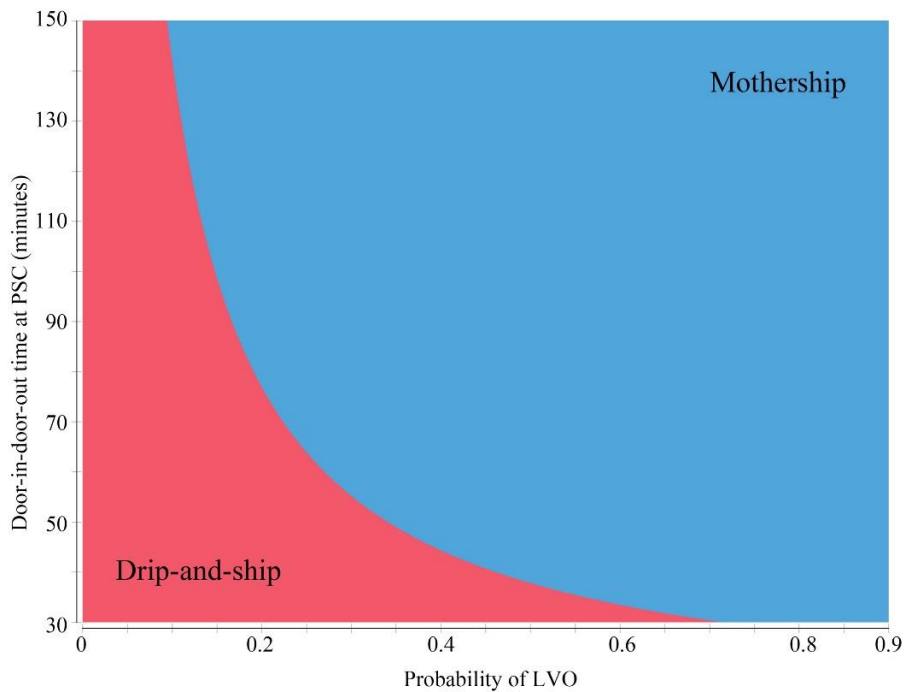

B.

### Figure II. Selected Two-way sensitivity analyses.

Two-way sensitivity analyses were conducted by varying two variables simultaneously while holding all other variables constant using base case values. (A) X-axis: probability of LVO; y-axis: the additional door-to-needle time at the PSC compared with the CSC, minutes. (B) X-axis: probability of LVO; y-axis: the door-in-door-out time spent at the PSC. If variables of a case fall into the blue area, “mothership” is favored; if variables of a case fall into the red area, “drip-and-ship” is favored. LVO, large vessel occlusion; PSC, primary stroke center; CSC, comprehensive stroke center.

**Supplemental Video Legend.****Video I. Results of the three-way sensitivity analysis.**

Three-way sensitivity analysis of the base case was conducted by jointly varying transport time from scene to primary stroke center arrival (x-axis), additional travel time if taken directly to a comprehensive stroke center (y-axis), and the probability of a large vessel occlusion (LVO). The probability of LVO is on the z-axis, which is represented by time elapsed in the video. The left panel presents results from applying the ideal time metrics, and the right panel presents results from applying the real-world time metrics). The color of the area represents the favorable triage strategy in terms of anticipated clinical outcomes: blue represents favorability of the mothership approach, red represents favorability of the drip-and-ship approach, and gray represents patients outside of the IV-tPA treatment window who were not included in this model. LVO, large vessel occlusion; PSC, primary stroke center; CSC, comprehensive stroke center.

## Reference

1. Messe SR, Khatri P, Reeves MJ, Smith EE, Saver JL, Bhatt DL, et al. Why are acute ischemic stroke patients not receiving IV tPA? Results from a national registry. *Neurology*. 2016;87:1565-1574
2. Dozois A, Hampton L, Kingston CW, Lambert G, Porcelli TJ, Sorenson D, et al. PLUMBER Study (Prevalence of Large Vessel Occlusion Strokes in Mecklenburg County Emergency Response). *Stroke*. 2017;48:3397-3399
3. Rai AT, Seldon AE, Boo S, Link PS, Domico JR, Tarabishy AR, et al. A population-based incidence of acute large vessel occlusions and thrombectomy eligible patients indicates significant potential for growth of endovascular stroke therapy in the USA. *Journal of Neurointerventional Surgery*. 2017;9:722-726
4. Saver JL, Goyal M, van der Lugt A, Menon BK, Majoie CB, Dippel DW, et al. Time to Treatment With Endovascular Thrombectomy and Outcomes From Ischemic Stroke: A Meta-analysis. *JAMA*. 2016;316:1279-1288
5. NINDS. Tissue plasminogen activator for acute ischemic stroke. *The New England Journal of Medicine*. 1995;333:1581-1587
6. Kim JT, Fonarow GC, Smith EE, Reeves MJ, Navalkale DD, Grotta JC, et al. Treatment With Tissue Plasminogen Activator in the Golden Hour and the Shape of the 4.5-Hour Time-Benefit Curve in the National United States Get With The Guidelines-Stroke Population. *Circulation*. 2017;135:128-139
7. Smith EE, Kent DM, Bulsara KR, Leung LY, Lichtman JH, Reeves MJ, et al. Accuracy of Prediction Instruments for Diagnosing Large Vessel Occlusion in Individuals With Suspected Stroke: A Systematic Review for the 2018 Guidelines for the Early Management of Patients With Acute Ischemic Stroke. *Stroke*. 2018;49:e111-e122
8. Zhao H, Coote S, Pesavento L, Churilov L, Dewey HM, Davis SM, et al. Large Vessel Occlusion Scales Increase Delivery to Endovascular Centers Without Excessive Harm From Misclassifications. *Stroke*. 2017;48:568-573
9. El-Ghanem M, Al-Mufti F, Thulasi V, Singh IP, Gandhi C. Expanding the treatment window for ischemic stroke through the application of novel system-based technology. *Neurosurgical Focus*. 2017;42:E7
10. Scheitz JF, Abdul-Rahim AH, MacIsaac RL, Cooray C, Sucharew H, Kleindorfer D, et al. Clinical Selection Strategies to Identify Ischemic Stroke Patients With Large Anterior Vessel Occlusion: Results From SITS-ISTR (Safe Implementation of Thrombolysis in Stroke International Stroke Thrombolysis Registry). *Stroke*. 2017;48:290-297
11. Froehler MT, Saver JL, Zaidat OO, Jahan R, Aziz-Sultan MA, Klucznik RP, et al. Interhospital Transfer Before Thrombectomy Is Associated With Delayed Treatment and Worse Outcome in the Stratis Registry (Systematic Evaluation of Patients Treated With Neurothrombectomy Devices for Acute Ischemic Stroke). *Circulation*. 2017;136:2311-2321
12. Powers WJ, Rabinstein AA, Ackerson T, Adeoye OM, Bambakidis NC, Becker K, et al. 2018 Guidelines for the Early Management of Patients With Acute Ischemic Stroke: A Guideline for Healthcare Professionals From the American Heart Association/American Stroke Association. *Stroke*. 2018;49:e46-e110

13. Ng FC, Low E, Andrew E, Smith K, Campbell BCV, Hand PJ, et al. Deconstruction of Interhospital Transfer Workflow in Large Vessel Occlusion: Real-World Data in the Thrombectomy Era. *Stroke*. 2017;48:1976-1979
14. Krumholz HM, Anderson JL, Bachelder BL, Fesmire FM, Fihn SD, Foody JM, et al. ACC/AHA 2008 performance measures for adults with ST-elevation and Non-ST-Elevation Myocardial Infarction. *Journal of the American College of Cardiology*. 2008;52:2046-2099
15. English JD, Yavagal DR, Gupta R, Janardhan V, Zaidat OO, Xavier AR, et al. Mechanical Thrombectomy-Ready Comprehensive Stroke Center Requirements and Endovascular Stroke Systems of Care: Recommendations from the Endovascular Stroke Standards Committee of the Society of Vascular and Interventional Neurology (SVIN). *Interventional Neurology*. 2016;4:138-150
16. Qureshi S JA, Raza SA, Brasher C, Anderson A, Belagaje S, Ranagaraju S, et al. Stroke Screening Tools Have High Specificity for Detecting Large Vessel Occlusion in a Southeastern Us Prospective Cohort Study [Abstract]. *Stroke*. 2016;47(suppl 1):WMP67
17. Katz BS, McMullan JT, Sucharew H, Adeoye O, Broderick JP. Design and validation of a prehospital scale to predict stroke severity: Cincinnati Prehospital Stroke Severity Scale. *Stroke*. 2015;46:1508-1512
18. Turc G, Maier B, Naggara O, Seners P, Isabel C, Tisserand M, et al. Clinical Scales Do Not Reliably Identify Acute Ischemic Stroke Patients With Large-Artery Occlusion. *Stroke*. 2016;47:1466-1472
